# Supplementary material for: Cross-sectoral communication by bringing together patient with cancer, general practitioner and oncologist in a video-based consultation: a qualitative study of oncologists’ and nurse specialists’ perspectives
Source: HighWire-hosted journal article supplement (doi:10.1136/bmjopen-2020-043038), 2021-05-01
Supplement: bmjopen-2020-043038supp001_data_supplement.pdf [file bmjopen-2020-043038supp001_data_supplement.pdf]

## Supplementary file 1

### INTERVIEW GUIDES

#### Interview guide – for interview of the oncologists

Thanks for taking part. Shortly about me and my involvement in the project.

Short presentation of participants (name, team, number of consultations within the project)

Please, tell openly about your experiences with Partnership consultations.

What happened?

Where was the patient placed and who participated?

What was your role?

Who talked – and with whom?

The content of the consultations. Did you talk about other topics than ‘the usual’?

Did you use the consultation guide?

Were decisions and important agreements made? Were roles shared? Give some examples.

Would these decisions and agreements otherwise not have been made? Were notes added to the electronic patient record?

What happened before and after the GP showed up at the screen?

What did you think or expect before entering a project consultation? Did your expectations change during the project?

And what about your reflections at the end of a consultation?

Have you subsequently experienced talking with the patient about ‘the day when your GP took part’?

How do you think the patients experienced having their GP onboard? Was it perceived beneficial to them?

And what about the relatives?

How did the GP participate in the dialogue?

Who gained something from the conversation? Did anyone feel safer afterward?

What did you get out of inviting the GP for a consultation?

What do you think the GP got out of it?

Is there something that you should be particularly cautious about when inviting the GP for a consultation?

What about your screen and the screenshot showing the GPs’ surgery. How were they used?

What about the screenshot showing your office. Who was visible? Did it matter who was visible?

Were the consultations scheduled at relevant time points of the patient trajectories?

Did the project consultations end up being extra consultations for the patients?

What about your time spent on the project?

All things considered, have the consultations made any difference?

Could the same knowledge have been shared more simply?

Have you changed your behavior or attitudes to GPs’ roles during cancer?

Did the specialist nurse play another role during the consultation than her usual?

Should there be ‘a future’ for these consultations at the Oncological department? (Amendments)

Is there a heartwarming story, a good case, or a situation that deserves to be underlined?

Other topics or experiences that we are missing?

We used video to bring the GP onboard a patient consultation. Can you see the potential of using video for consultations with patients being at home?

**Interview guide - nurse specialists**

Thanks for taking part. Shortly about me and my involvement in the project.

Short presentation of participants (name, team, number of consultations in the project)

Please, tell openly about your experiences with Partnership consultations.

What happened?

What happened before and after the contact with the general practitioner was established?

Your role?

Did you solve problems in other ways as compared to the usual encounters without the participation of a general practitioner?

Do you remember your thoughts and reflections when entering the encounter? Did these expectations change over time?

What did you think about the concept, after having participated yourself?

What kind of expectations did the other participants have to the encounters?

Have you subsequently experienced talking with the patients and their relatives about 'the day when your general practitioner took part'?

Have you got any feedback from the general practitioners? Or the oncologists?

Has involvement of the general practitioner made any difference – to

Problem-solving in the department

Enquiries from the patients

Your thoughts about and expectations regarding general practitioners as health care partners to patients and their relatives

Role clarification, and who should take on the different tasks

Sharing of knowledge between the doctors

The patients' perceptions of continuity of treatment and care. Their sense of security?

Were patients, doctors, and you ready to have the general practitioner onboard?

To your opinion, which parts of the consultations were the most meaningful and important?

Who was the key figure?

Your experiences of the screen. Did you use it more than at the beginning and the end of the video session?

Were the different participants ready for using video?

What is the most important you have learned by this project?

Which patients gained the most of these consultations?

Is it possible, that these consultations have had any negative influence? To the participants, the cooperation with general practice (patients' as well as yours), or the working flow at the department level?

To your opinion, should Partnership consultations be implemented in the department?

Any other topics or experiences that we are missing?

We used video to bring the GP onboard a patient consultation. Can you see the potential of using video for consultations with patients being at home?
